# Supplementary material
Source: publisher figshare collection journal article supplement (https://acs.figshare.com/ndownloader/files/11300333)
Supplement: Supplementary file 1 [file 11300333]

# SUPPORTING INFORMATION

## Unexpected selectivity in the functionalization of neat castor oil under benign catalyst-free conditions

Latchmi C. Raghunanan<sup>a,\*</sup>, Inmaculada Martínez<sup>a</sup>, Concepción Valencia<sup>a</sup>, M. Carmen Sánchez<sup>a</sup>, and José M. Franco<sup>a,\*</sup>

<sup>a</sup> Pro2TecS-Chemical Product and Process Technology Research Centre. Departamento de Ingeniería Química, Facultad de Ciencias Experimentales, Universidad de Huelva, Campus de El Carmen, Huelva 21071, Spain.

\* franco@uhu.es; latchmi.singh@gmail.com

Total number of pages: 14

Total number of figures: 5

Total number of tables: 1

|                                                                                                                                                                                                                                                                                                      |     |
|------------------------------------------------------------------------------------------------------------------------------------------------------------------------------------------------------------------------------------------------------------------------------------------------------|-----|
| Materials and Methods.....                                                                                                                                                                                                                                                                           | S2  |
| Figure S1: <sup>1</sup> H-NMR spectra of methanol-quenched NCO-containing prepolymers, obtained at 500 MHz and using CDCl <sub>3</sub> solvent. (a) 8416, (b) 7525, (c) 6832.....                                                                                                                    | S5  |
| Table S1: Quantification of unreacted isocyanates and degree of castor oil functionalization of urethane pre-polymers, as obtained from methanol-quenched <sup>1</sup> H-NMR experiments.....                                                                                                        | S8  |
| Figure S2: (a) <sup>1</sup> H-, (b) COSY-, (c) <sup>13</sup> C DEPT135, and (d) <sup>13</sup> C- NMR characterization of a representative NCO-containing prepolymer, obtained in CDCl <sub>3</sub> solvent at 300 and 400 MHz for <sup>1</sup> H and <sup>13</sup> C experiments, respectively ..... | S9  |
| Figure S3: Viscosity flow curves of prepolymers showing decreasing viscosity with increasing NCO content.....                                                                                                                                                                                        | S13 |
| Figure S4: Conformations typically assumed by triglycerides, reproduced for ricinolein. (a) Tuning fork; (b) Chair; (c) Trident; (d) Random fluid.....                                                                                                                                               | S13 |
| Figure S5: Deconvolution of FTIR OH peak of castor oil to show hydrogen bonded (3374 cm <sup>-1</sup> ) and non-hydrogen bonded (3523 cm <sup>-1</sup> ) OH peak contributions.....                                                                                                                  | S14 |

## Materials and Methods

### *Materials*

1,6-hexamethylene diisocyanate (HMDI, 98.0% purity) was purchased from Sigma-Aldrich, and castor oil (211 cSt at 40 °C) was obtained from Guinama (Spain). All materials were used as received without further purification.

### *Synthesis of pre-polymers*

Castor oil (84, 75 or 68 parts by weight) and HMDI (16, 25 or 32 parts by weight, respectively) were combined, covered, and stirred at 200-300 rpm at room temperature for 24 hours to give the desired pre-polymer formulation. The nomenclature of the obtained formulations and their molar compositions are presented in Table 1 of the associated manuscript.

### *Chemical composition of castor oil*

Fatty acid and cholesterol profiles in castor oil were determined according to the IUPAC Standard Methods. Results are as follows:

| <b>Fatty Acids</b>        |       | <b>Sterol</b>         |  | <b>Composition (%)</b> |  |
|---------------------------|-------|-----------------------|--|------------------------|--|
| Palmitic acid, 16:0       | 0.94  | Colesterol            |  | 0.28                   |  |
| Stearic acid, 18:0        | 1.11  | Brasicasterol         |  | 0                      |  |
| Oleic acid, 18:1 (9)      | 2.52  | 24-metilencolesterol  |  | 0                      |  |
| Vaccenic acid, 18:1 (11)  | 0.45  | Campesterol           |  | 10.94                  |  |
| Linoleic acid, 18:2       | 3.88  | Campestanol           |  | 0.32                   |  |
| Linolenic acid, 18:3      | 0.43  | Estigmasterol         |  | 20.71                  |  |
| Ecosenoic acid, 20:1      | 0.26  | Delta 7 campesterol   |  | 0                      |  |
| Ricinoleic acid, 18:1-OH  | 89.91 | 5,23 estigmastadienol |  | 0                      |  |
| Lesquerolic acid, 20:1-OH | 0.49  | Clerosterol           |  | 0                      |  |
|                           |       | B-Sitosterol          |  | 48.9                   |  |
|                           |       | Sitostanol            |  | 1.3                    |  |
|                           |       | 5-Avenasterol         |  | 14.21                  |  |
|                           |       | 5,24-Estigmastadienol |  | 2.54                   |  |
|                           |       | 7-Estigmasterol       |  | 0.31                   |  |
|                           |       | 7-Avenasterol         |  | 0.49                   |  |
|                           |       | <b>TOTAL (mg/Kg)</b>  |  | <b>1879</b>            |  |

*Fourier Transform Infra-Red (FTIR)*

Fourier Transform Infra-Red (FTIR) measurements were performed using a Jasco FT4200 infrared spectrometer (JASCO Inc., Tokyo, Japan) equipped with an attenuated total reflectance (ATR) system. Samples were loaded onto the ATR crystal area and the respective spectra obtained in the transmission mode over a scanning range of 4000–400  $\text{cm}^{-1}$  for  $\sim 80$  repeated scans at a resolution of 4  $\text{cm}^{-1}$ . All spectra were transformed into the absorbance mode using the Spectra Manager software (version 2.10.2.1), baseline corrected and normalized to the  $\text{CH}_2$  peak area.

*Nuclear Magnetic Resonance:  $^1\text{H}$ -NMR of quenched samples for quantitative comparisons*

NCO-containing pre-polymers for  $^1\text{H}$ -NMR measurements were dissolved in excess methanol at immediately following the synthesis reaction (i.e., at  $t_0$ ) in order to quench the unreacted isocyanate. Methanol was subsequently removed by evaporation at room temperature followed by drying under vacuum at room temperature for 24 hours.

$^1\text{H}$  spectra were acquired on a Bruker Avance 500 MHz spectrometer (Bruker, USA) equipped with a 5-mm Broadband Observe (BBFO) probe with z gradient. Spectra were acquired at 25  $^\circ\text{C}$  over a 16- ppm spectral window with a 10 s recycle delay, 32 transients. Spectra were Fourier transformed, phase corrected, and baseline corrected. The spectral width was 10330.572 Hz for  $^1\text{H}$ . Chemical shifts were referenced using  $\text{CDCl}_3$  ( $\delta(^1\text{H}) = 7.24$  ppm) as solvent. Spectra were analysed using ACD/NMR Processor Academic Edition software (Version 12.01).

*Qualitative Nuclear Magnetic Resonance: Supporting  $^{13}\text{C}$ - and 2D-NMR for chemical characterization*

$^1\text{H}$ - $^1\text{H}$  COSY,  $^{13}\text{C}$  DEPT135 and  $^{13}\text{C}$  NMR experiments were performed on a representative NCO-containing prepolymer (8416) as obtained immediately following processing; i.e., without prior NCO quenching.  $\text{CDCl}_3$  was used as solvent, and all peaks were referenced relative to TMS. For the  $^1\text{H}$  experiments, a 300 MHz spectrometer (Bruker, USA) was used, and for the  $^{13}\text{C}$  experiments, a 400 MHz spectrometer spectrometer (Bruker, USA) was used. Spectra were analysed using ACD/NMR Processor Academic Edition software (Version 12.01).

*Thermogravimetric Analysis (TGA)*

Thermogravimetric Analysis (TGA) measurements were performed using a Q50 model TGA (TA Instruments, New Castle, DE, USA) under constant nitrogen flow (sample flow 60 mL/min; balance flow 40 mL/min). Typically, 12-17 mg of pre-polymer were loaded onto a platinum pan and heated to 600 °C at a rate of 10 °C/min. TGA data were analysed using the ‘TA Universal Analysis’ software (Version 4.5A).

*Rheology*

Using a controlled-stress Physica MCR501 (Anton Paar, Austria) rheometer, viscosity flow curves were obtained by applying a stepped shear rate ramp in the shear rate range of 1 to 100  $\text{s}^{-1}$  at 25 °C using a rough plate–plate geometry (25 mm diameter, 0.5 mm gap).

(a)

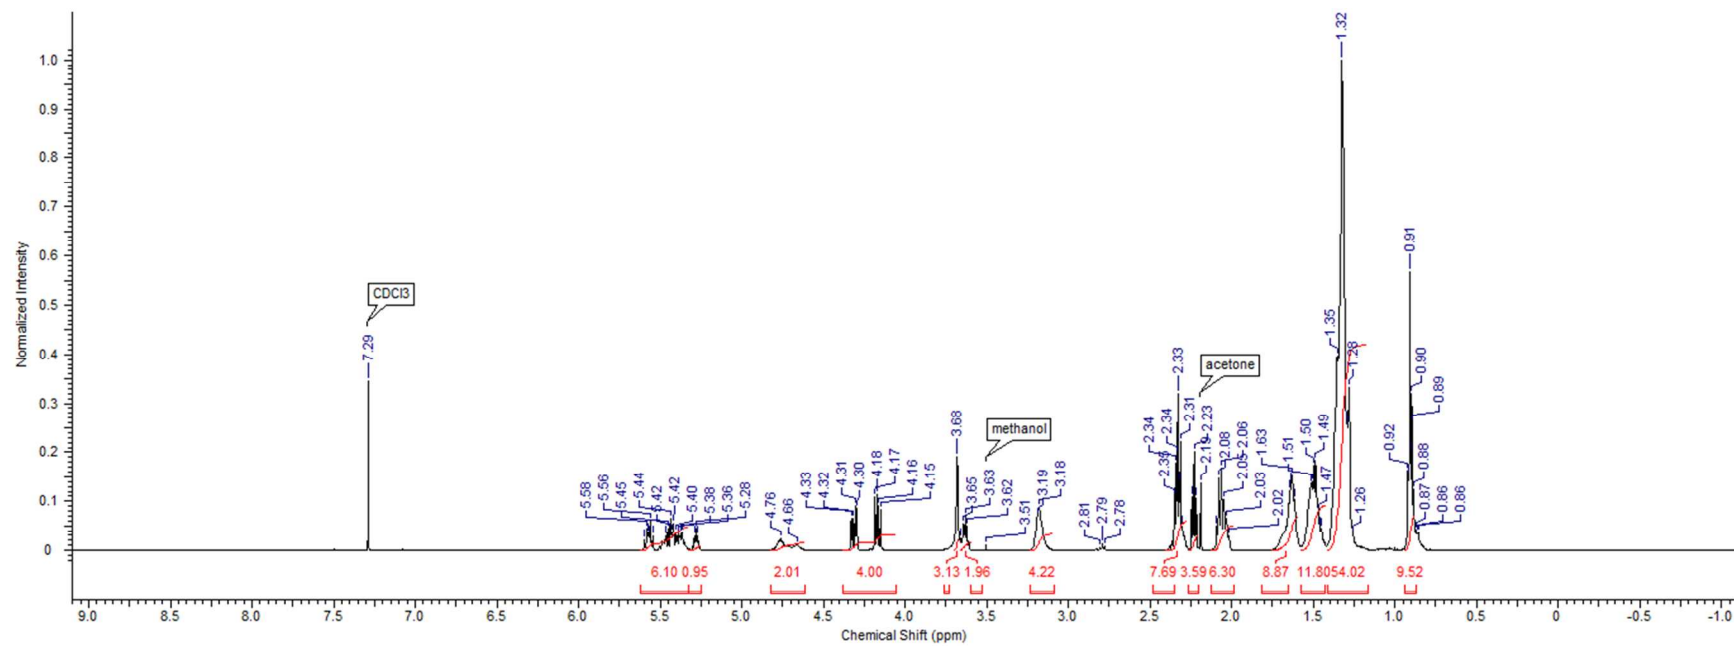

Figure S1:  $^1\text{H}$ -NMR spectra of methanol-quenched NCO-containing prepolymer, obtained at 500 MHz and using  $\text{CDCl}_3$  solvent. (a)

8416, (b) 7525, (c) 6832.

(b)

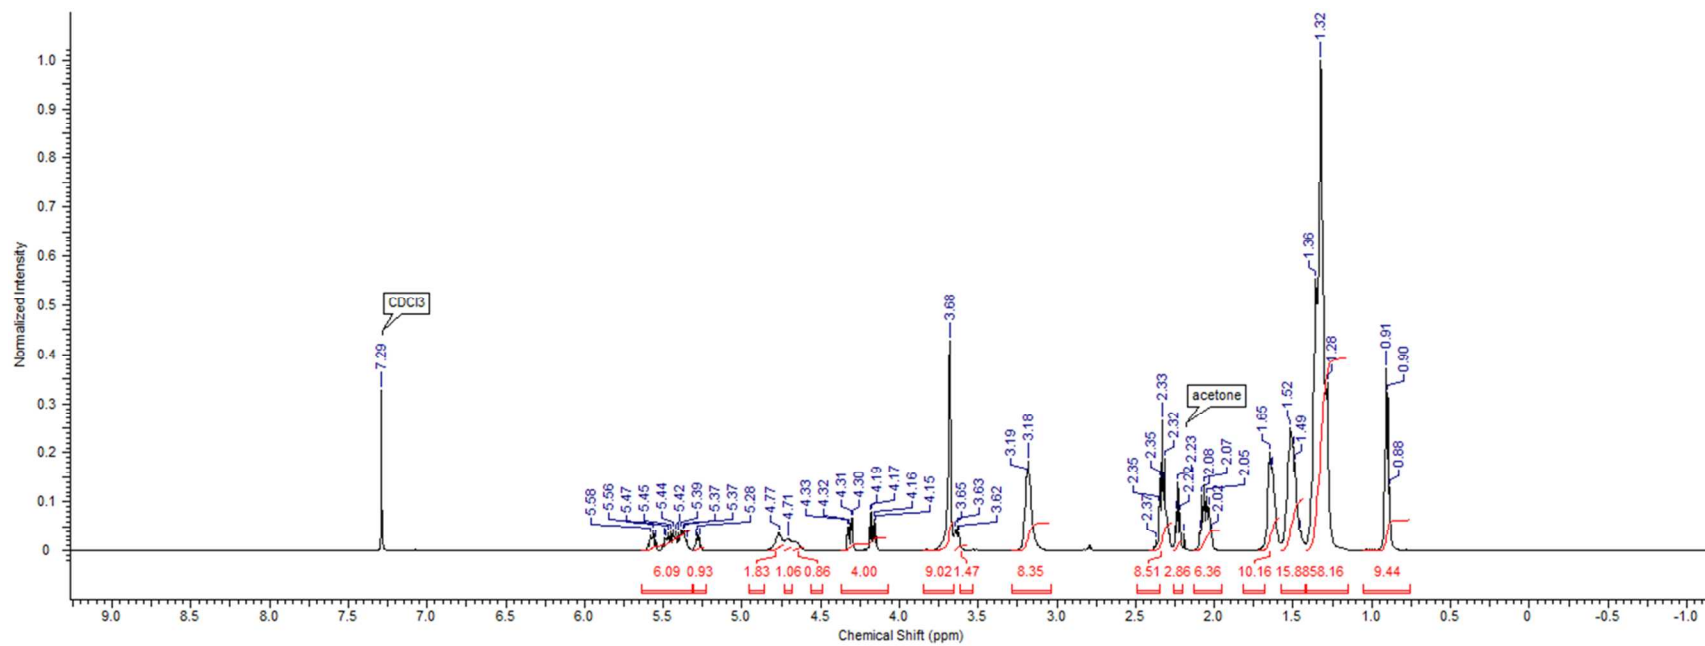

Figure S1 (cont'd):  $^1\text{H}$ -NMR spectra of methanol-quenched NCO-containing prepolymer, obtained at 500 MHz and using  $\text{CDCl}_3$  solvent. (a) 8416, (b) 7525, (c) 6832.

(c)

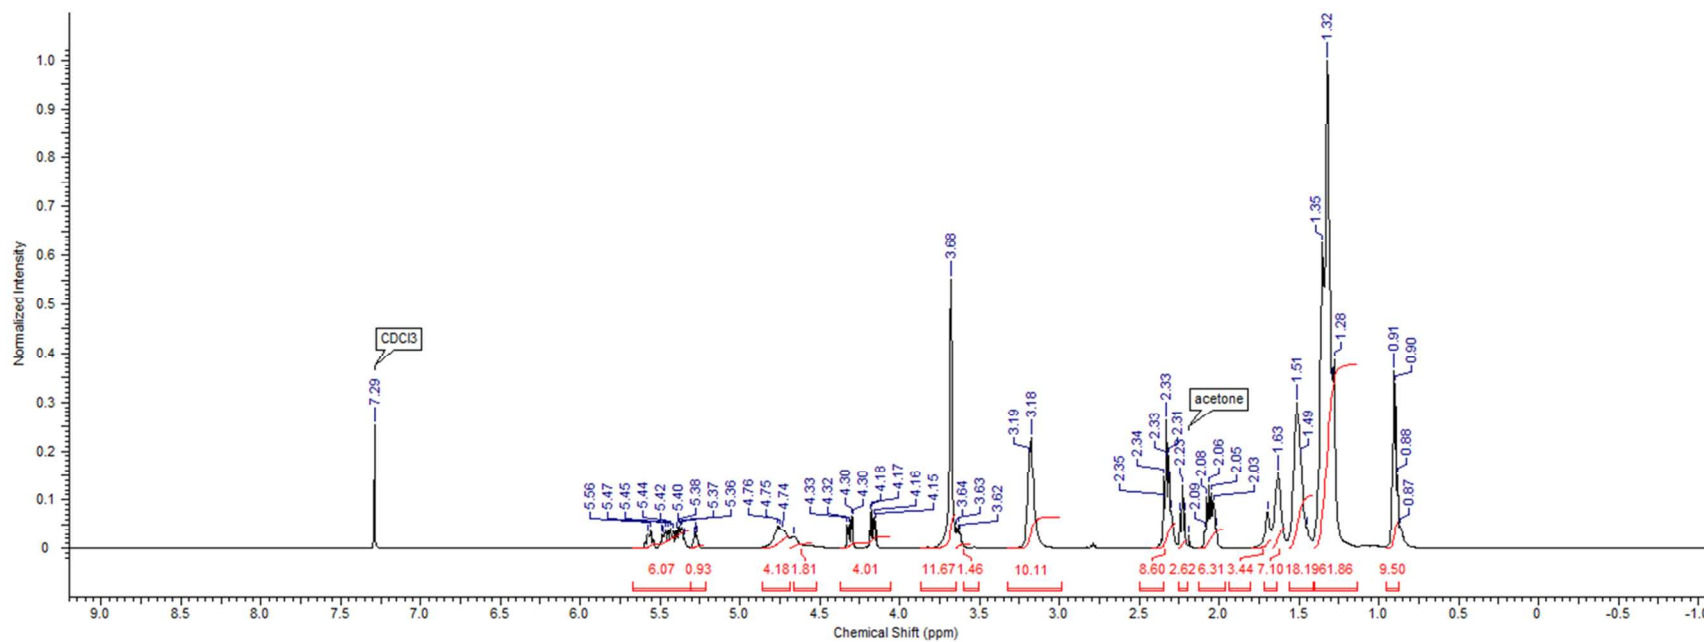

Figure S1 (cont'd):  $^1\text{H}$ -NMR spectra of methanol-quenched NCO-containing prepolymers, obtained at 500 MHz and using  $\text{CDCl}_3$  solvent. (a) 8416, (b) 7525, (c) 6832.

Table S1: Quantification of unreacted isocyanates and degree of castor oil functionalization of urethane pre-polymers, as obtained from methanol-quenched  $^1\text{H}$ -NMR experiments.

|                                        | 8416 | 7525 | 6832 |
|----------------------------------------|------|------|------|
| Total NCO (p/3)                        | 1    | 3    | 4    |
| Total NHCOO (m/2)                      | 2    | 4    | 5    |
| NHCOO from castor oil only (m/2 – p/3) | 1    | 1    | 1    |



(a)

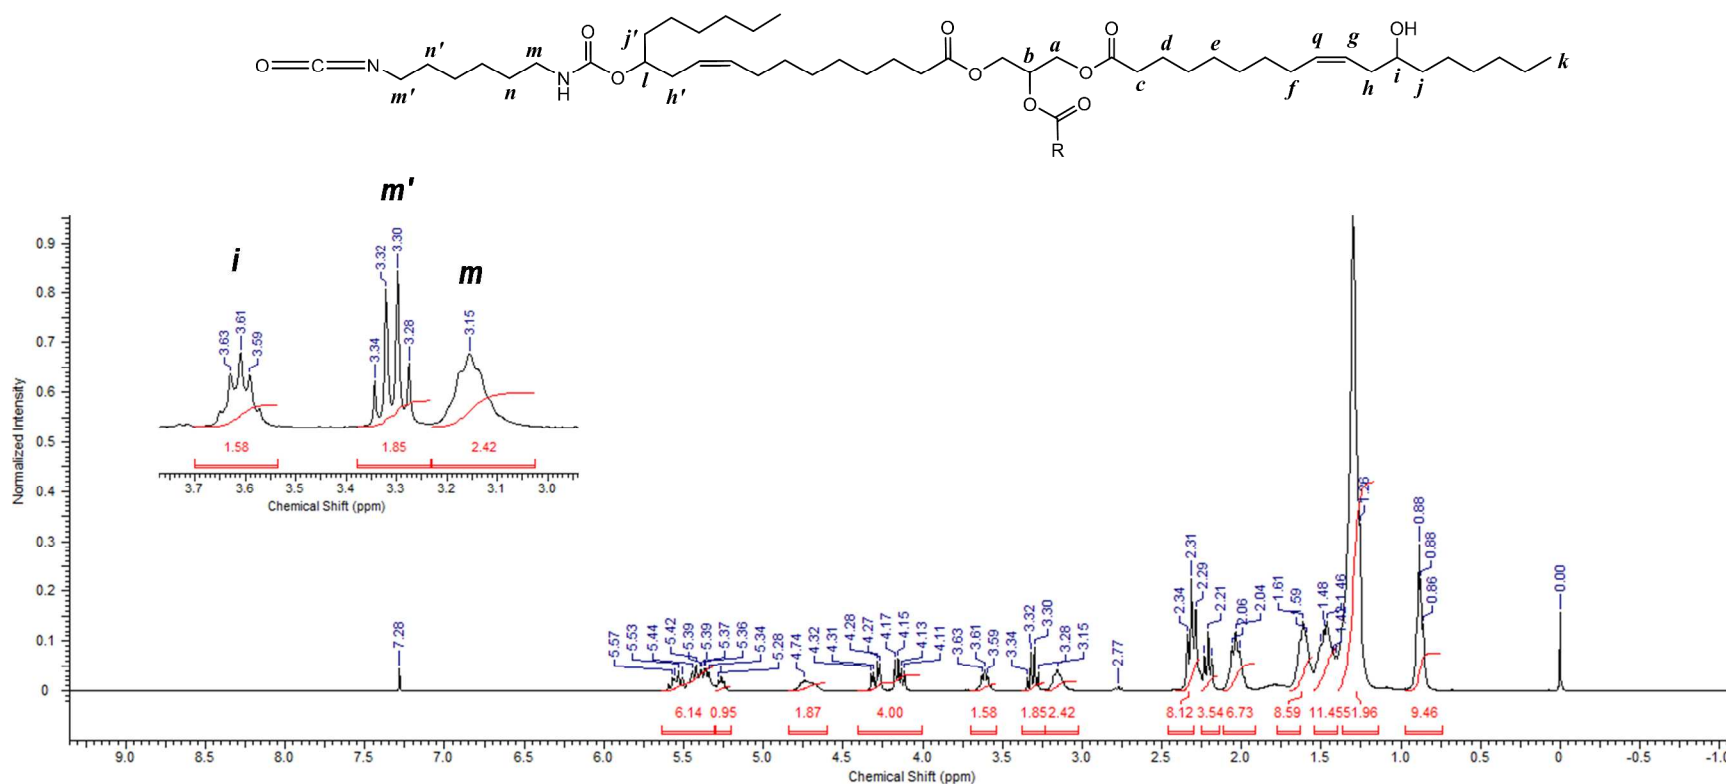

Figure S2: (a)  $^1\text{H}$ -, (b) COSY-, (c)  $^{13}\text{C}$  DEPT135, and (d)  $^{13}\text{C}$ - NMR characterization of a representative NCO-containing prepolymer, obtained in  $\text{CDCl}_3$  solvent at 300 and 400 MHz for  $^1\text{H}$  and  $^{13}\text{C}$  experiments, respectively.

(b)

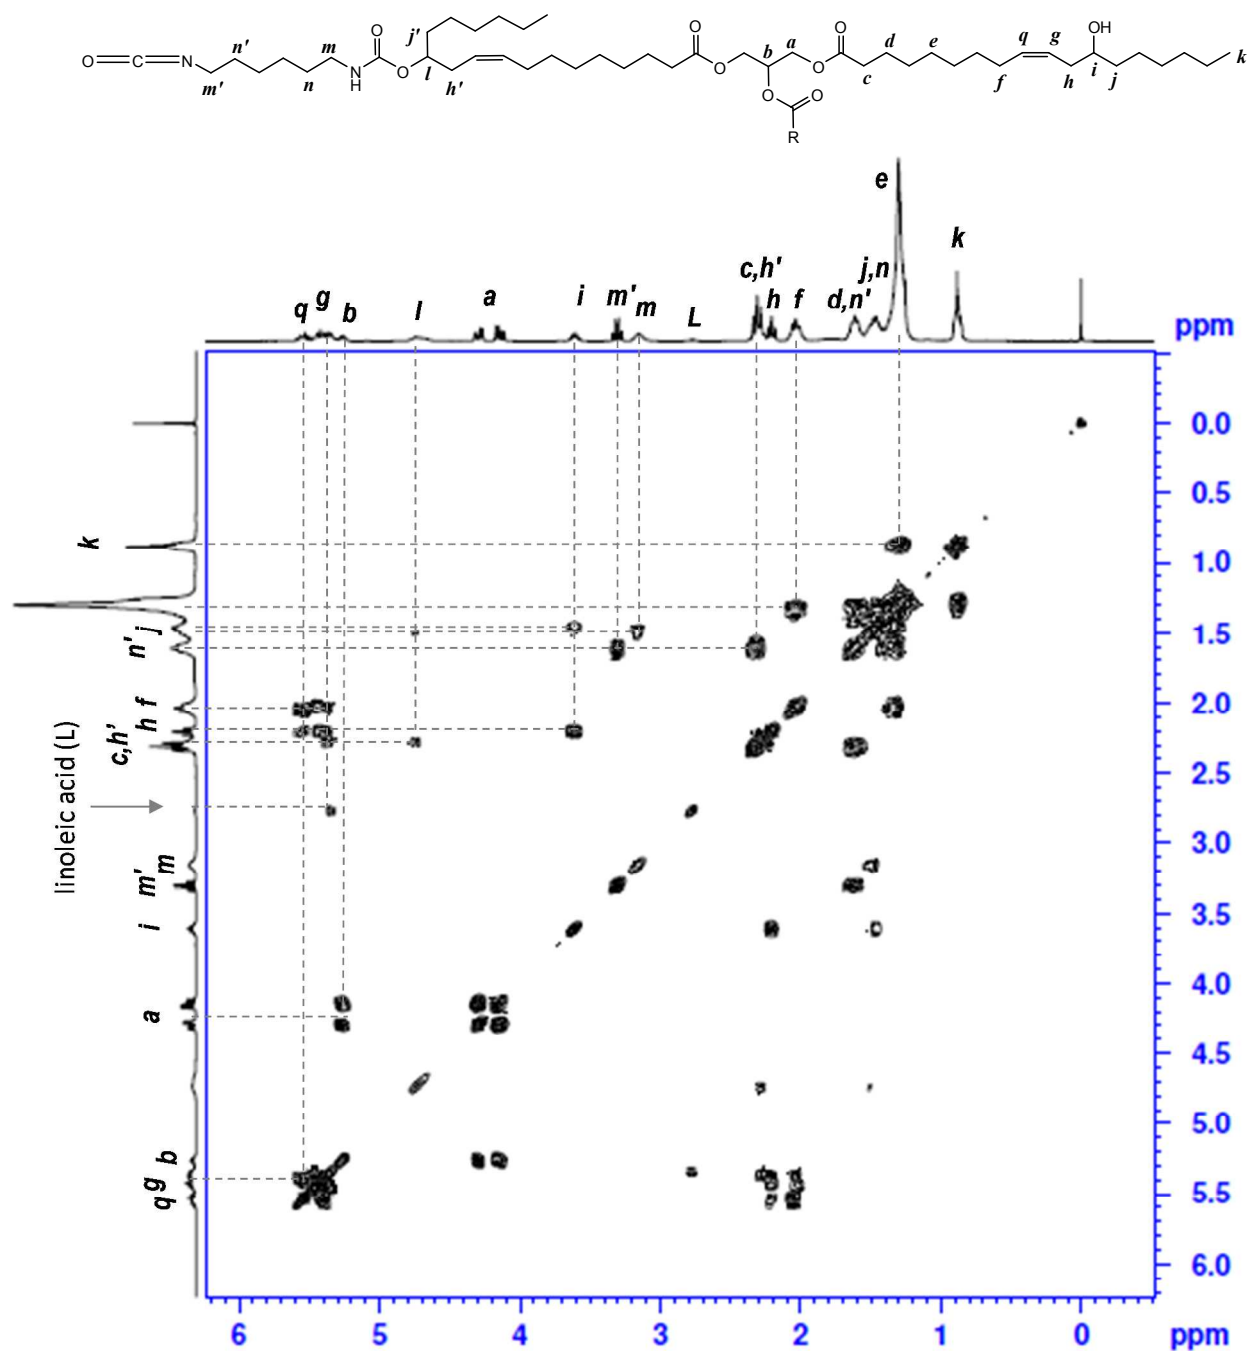

Figure S2 (cont'd): (a) <sup>1</sup>H-, (b) COSY-, (c) <sup>13</sup>C DEPT135, and (d) <sup>13</sup>C- NMR characterization of a representative NCO-containing prepolymer, obtained in CDCl<sub>3</sub> solvent at 300 and 400 MHz for <sup>1</sup>H and <sup>13</sup>C experiments, respectively.

(c)

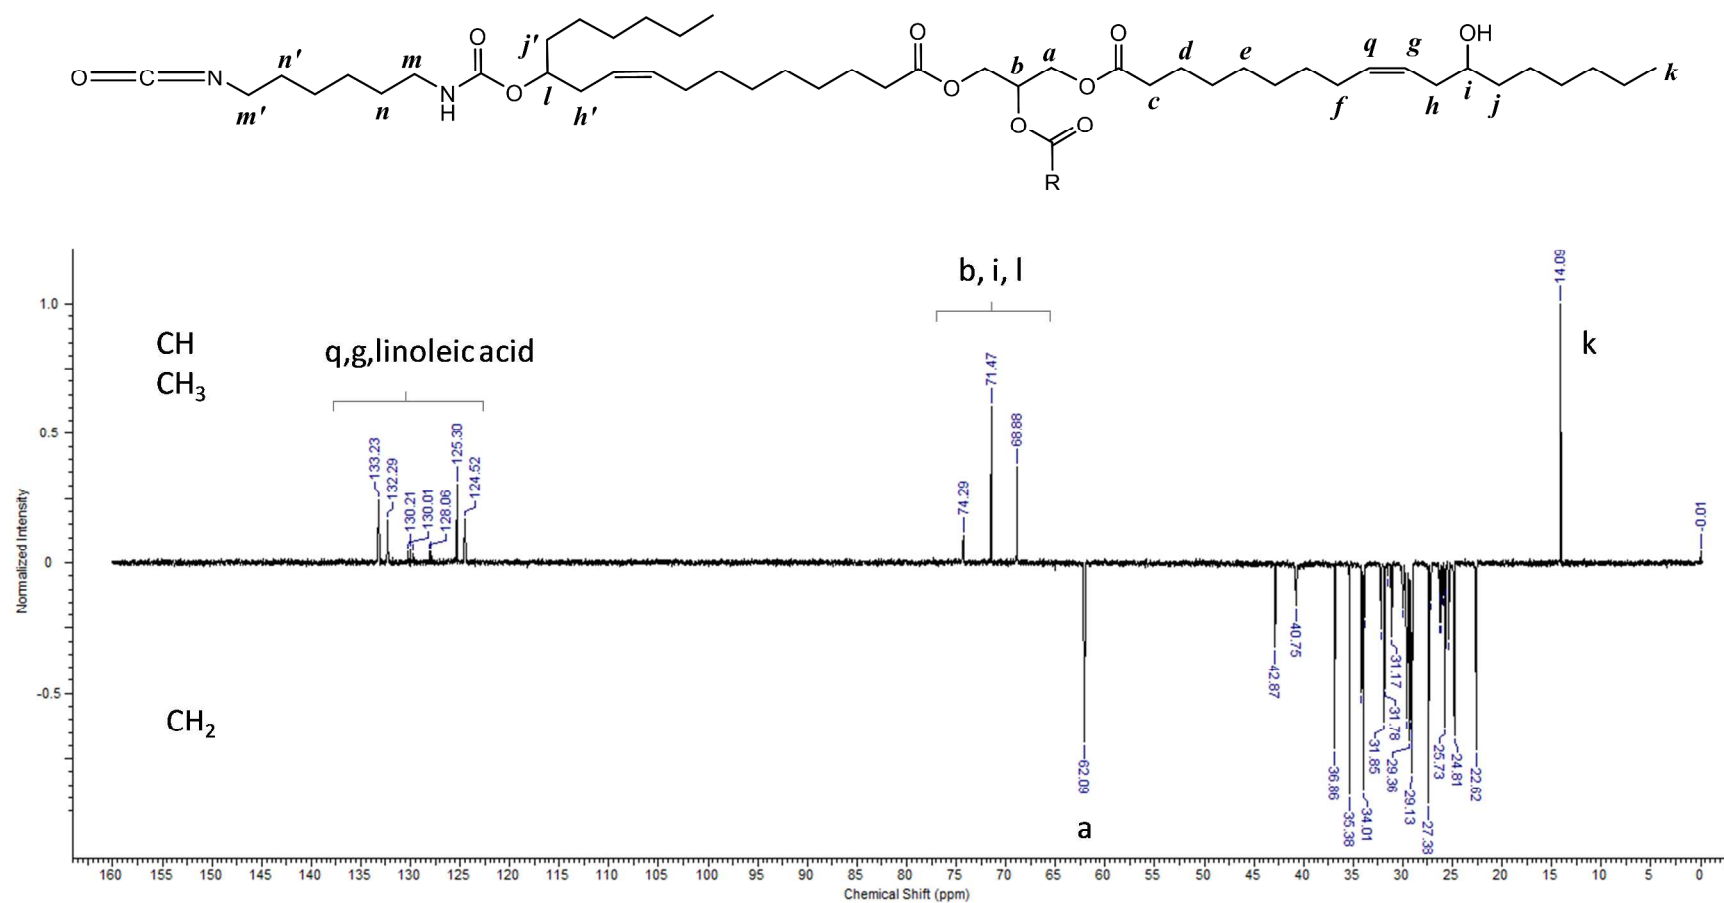

Figure S2 (cont'd): (a)  $^1\text{H}$ -, (b) COSY-, (c)  $^{13}\text{C}$  DEPT135, and (d)  $^{13}\text{C}$ - NMR characterization of a representative NCO-containing prepolymer, obtained in  $\text{CDCl}_3$  solvent at 300 and 400 MHz for  $^1\text{H}$  and  $^{13}\text{C}$  experiments, respectively.

(d)

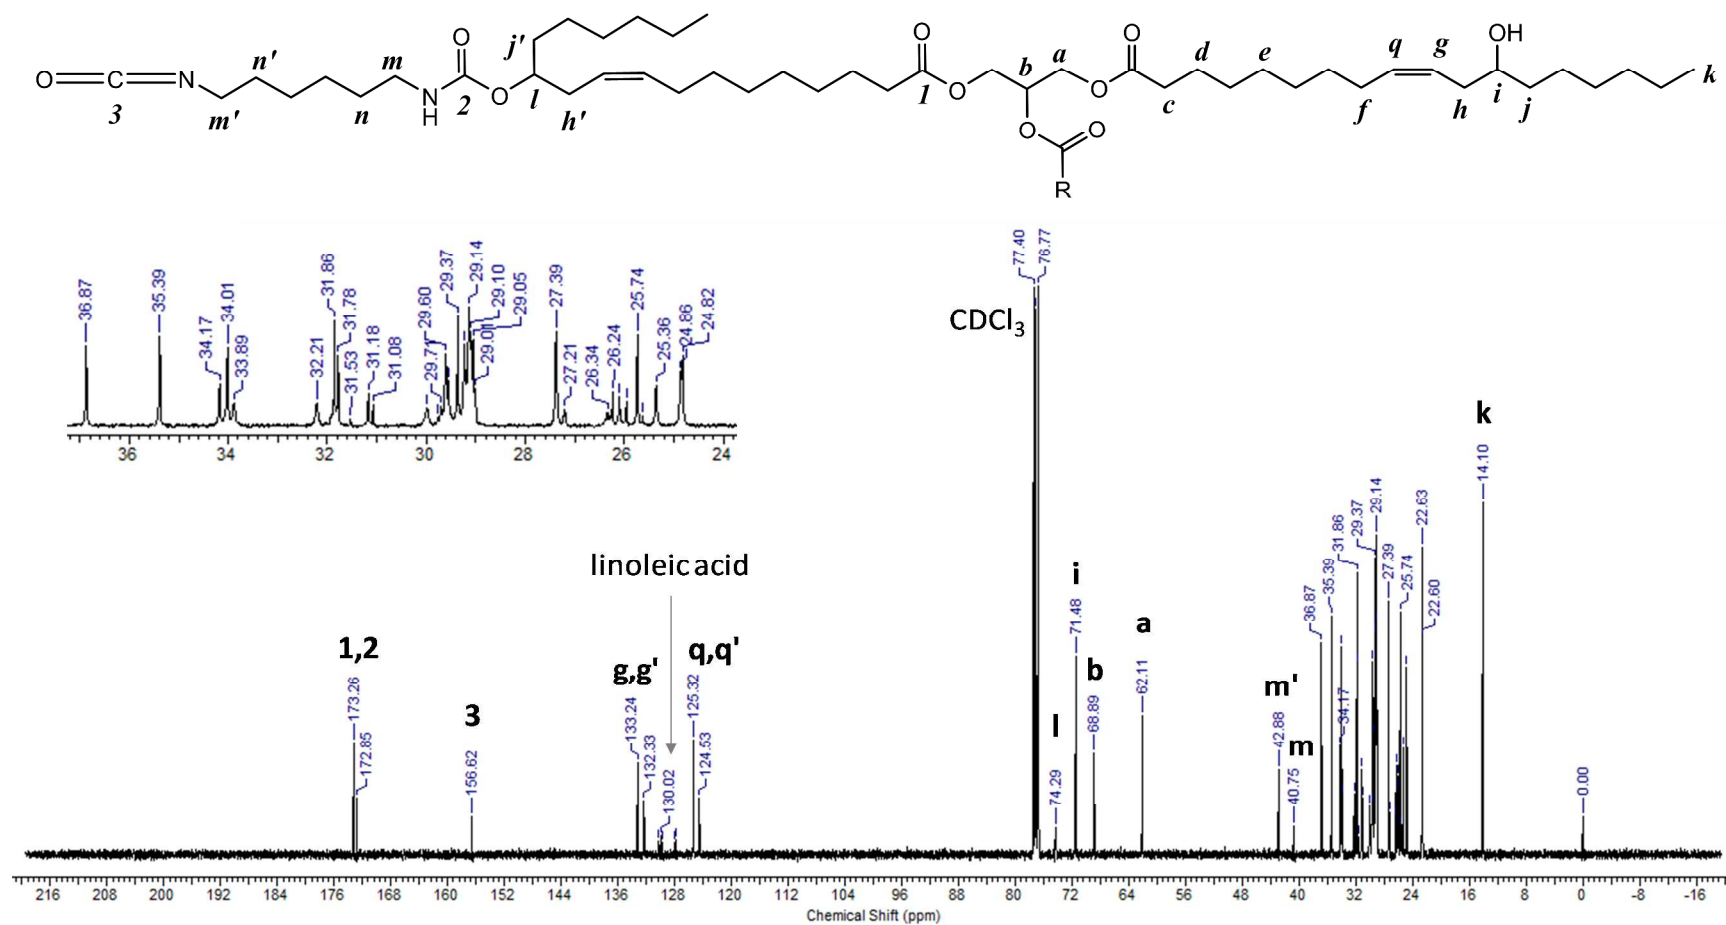

Figure S2 (cont'd): (a)  $^1\text{H}$ -, (b) COSY-, (c)  $^{13}\text{C}$  DEPT135, and (d)  $^{13}\text{C}$ -NMR characterization of a representative NCO-containing prepolymer, obtained in  $\text{CDCl}_3$  solvent at 300 and 400 MHz for  $^1\text{H}$  and  $^{13}\text{C}$  experiments, respectively.

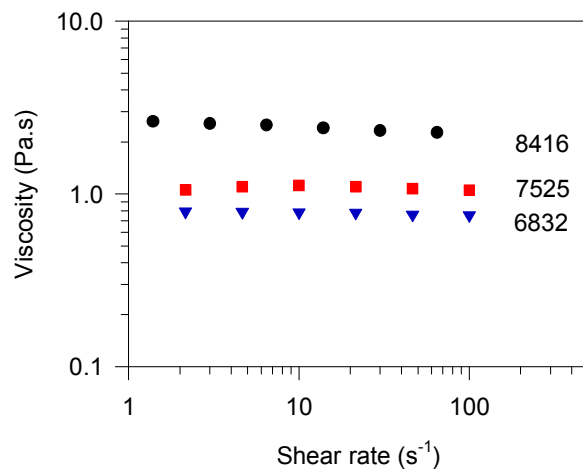

Figure S3: Viscosity flow curves of prepolymers showing decreasing viscosity with increasing NCO content (prepolymer formulations in order of increasing NCO content: 8416 < 7525 < 6832).

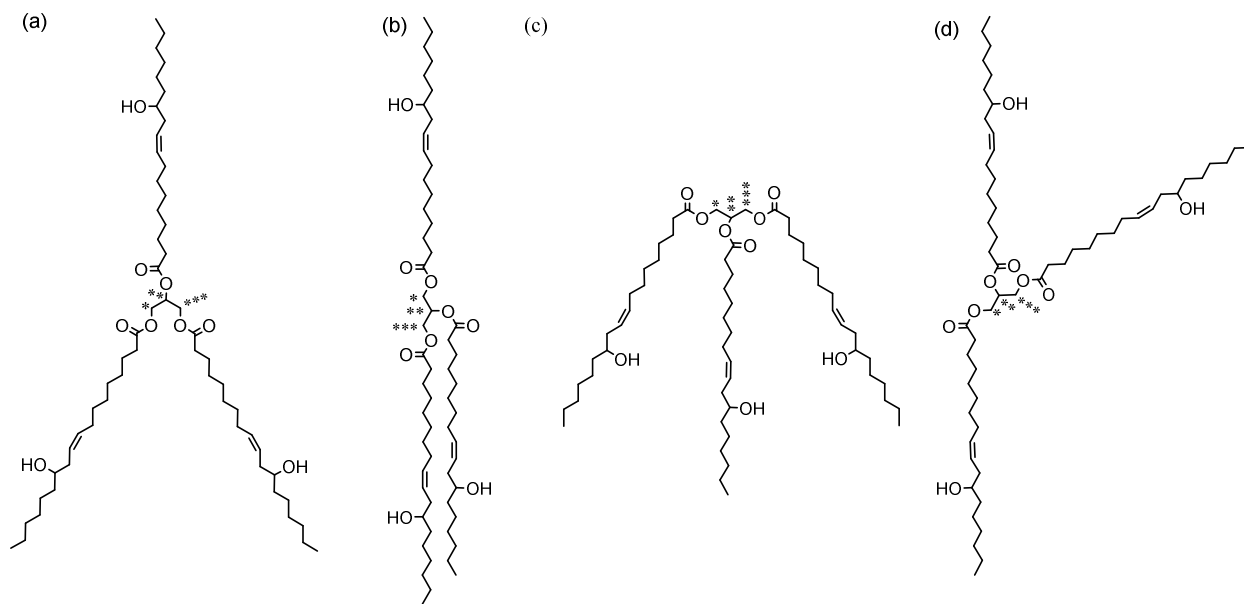

Figure S4: Conformations typically assumed by triglycerides, reproduced for ricinolein. (a) Tuning fork; (b) Chair; (c) Trident; (d) Random fluid. \*, \*\* and \*\*\* mark sn-1, sn-2 and sn-3 centers, respectively. Structures a-c are usually found in crystallized triglycerides, and structure d shows a representative random structure as expected in fluids.

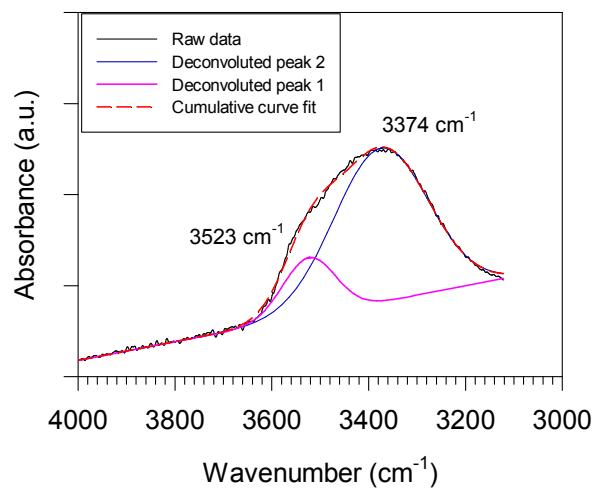

Figure S5: Deconvolution of FTIR OH peak of castor oil to show hydrogen bonded (3374 cm<sup>-1</sup>) and non-hydrogen bonded (3523 cm<sup>-1</sup>) OH peak contributions.
